# Supplementary material for: Context-Dependent Role of Glucocorticoid Receptor Alpha and Beta in Breast Cancer Cell Behaviour
Source: MDPI journal article supplement (doi:10.3390/cells12050784), 2023-03-01
Supplement: s1 [file s1]

**Supplementary Table S1.** Histologic characteristic of samples used for GRtotal and GR $\beta$  immunohistochemistry

| Tumor histology              | Nottingham histologic grade | TIL (%) | TN       | Nottingham prognostic index | ER  | PR  | Her2 | Ki67 (%) |
|------------------------------|-----------------------------|---------|----------|-----------------------------|-----|-----|------|----------|
| Invasive carcinoma NST       | grade II                    | 5       | pT1c N0  | 3.28                        | pos | pos | neg  | 2        |
| Invasive carcinoma NST       | grade I                     | 5       | pT2 N1   | 3.42                        | pos | pos | neg  | 3        |
| Invasive mucinosus carcinoma | grade II                    | 0       | pT2 N0   | 3.48                        | pos | pos | neg  | 3        |
| Invasive carcinoma NST       | grade II                    | 5       | pT1c N0  | 3.36                        | pos | pos | neg  | 5        |
| Invasive carcinoma NST       | grade III                   | 10      | pT2 N1a  | 5.96                        | pos | pos | neg  | 25       |
| Invasive carcinoma NST       | grade I                     | 0       | pT1c N0  | 2.26                        | pos | pos | neg  | 5        |
| Invasive lobular carcinoma   | grade II                    | 5       | pT3 N1a  | 5.3                         | pos | pos | neg  | 3        |
| Invasive carcinoma NST       | grade II                    | 0       | pT1c N0  | 3.3                         | pos | pos | neg  | 3        |
| Invasive carcinoma NST       | grade II                    | 5       | pT1c N0  | 3.26                        | pos | pos | neg  | 20       |
| Invasive lobular carcinoma   | grade II                    | 5       | pT2 N1   | 4.72                        | pos | pos | neg  | 2        |
| Invasive carcinoma NST       | grade III                   | na      | cT1c cN0 |                             | pos | pos | neg  | 15       |
| Invasive carcinoma NST       | grade III                   | 15      | pT1c N0  | 4.28                        | neg | neg | neg  | 75       |
| Invasive carcinoma NST       | grade II                    | 5       | pT1c N0  | 3.26                        | neg | neg | neg  | 15       |
| Invasive carcinoma NST       | grade III                   | 10      | ypT2 N0  | 4.9                         | neg | neg | neg  | 30       |
| Invasive carcinoma NST       | grade III                   | 10      | pT1c N0  | 4.32                        | neg | neg | neg  | 30       |
| Invasive carcinoma NST       | grade III                   | 40      | pT1c N0  | 4.38                        | neg | pos | neg  | 85       |
| Invasive carcinoma NST       | grade III                   | 20      | pT1c N0  | 4.3                         | neg | neg | neg  | 50       |
| Invasive carcinoma NST       | grade III                   | 5       | pT1c N0  | 4.24                        | neg | neg | neg  | 30       |
| Invasive apocrine carcinoma  | grade II                    | 5       | pT2 N1   | 4.44                        | neg | neg | neg  | 10       |
| Invasive carcinoma NST       | grade III                   | 5       | pT3 N1   | 6.56                        | neg | neg | neg  | 60       |

NST: no special type

Nottingham histologic grade: Grade I is assigned for a total score of 3 to 5 (well differentiated). Grade II is assigned for a total score of 6 to 7 (moderately differentiated). Grade III is assigned for a total score of 8-9 (poorly differentiated).

TIL: tumor infiltrating lymphocyte

T: tumor size; N: spread of cancer to nearby lymph nodes

Nottingham prognostic index: I (excellent)  $\leq 2.4$ ; II (good)  $>2.4$  but  $\leq 3.4$ ; III (moderate)  $>3.4$  but  $\leq 5.4$ ; and IV (poor)  $>5.4$ .

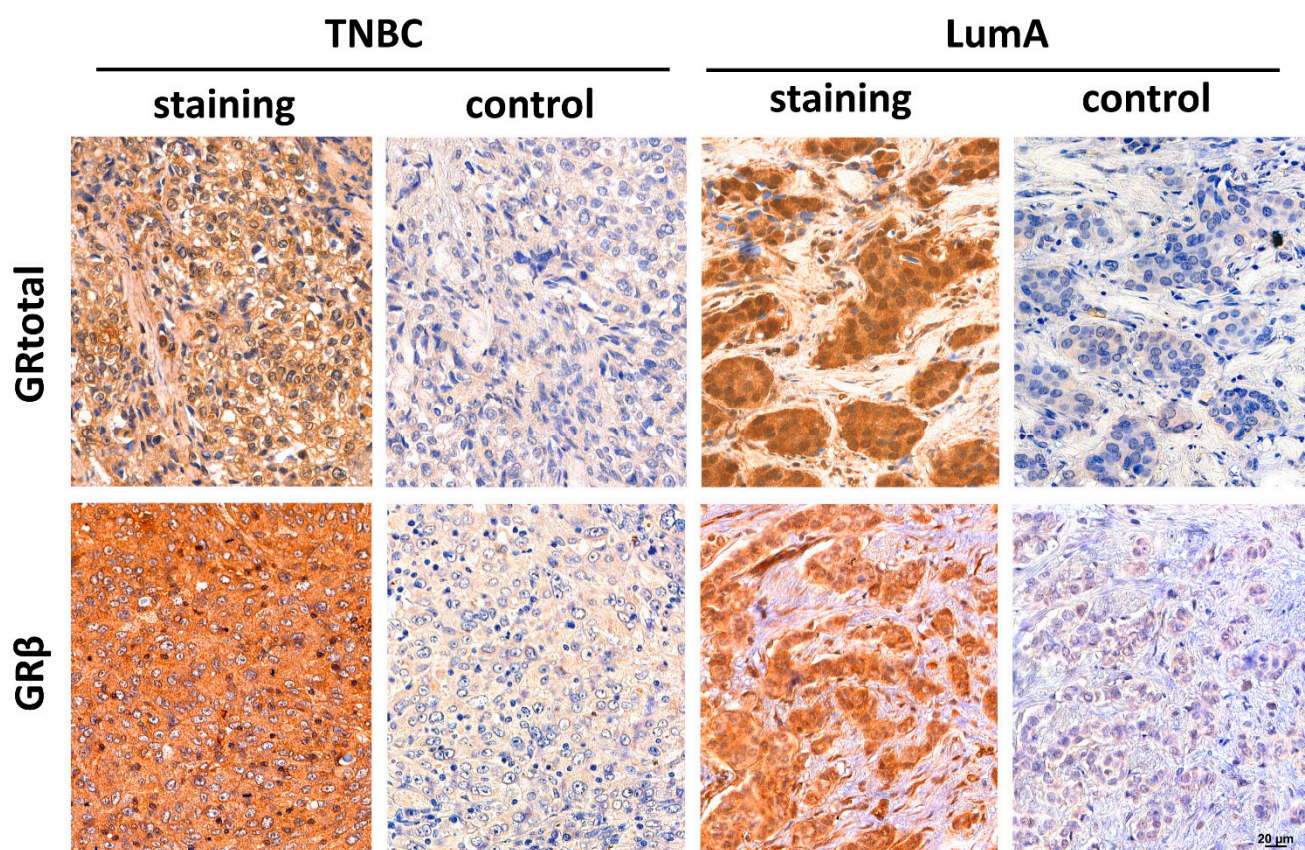

**Supplementary Figure S1.** Glucocorticoid receptor staining specificity using N-terminal specific antibody reflecting and referred as (GRtotal) and a selective antibody specific against the GR $\beta$  isoform (GR $\beta$ ), indicated as staining in triple-negative and luminal A type breast cancer. Controls are presented as negative control omitting the primary antibody.

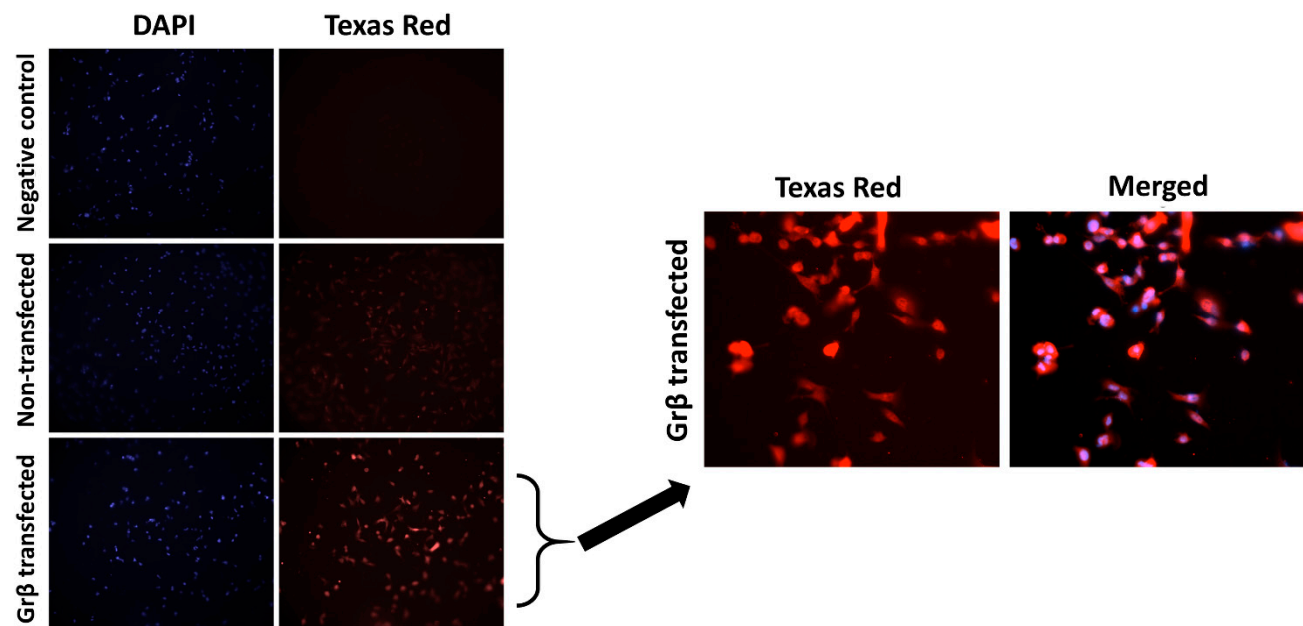

**Supplementary Figure S2.** Immunocytochemistry using anti-GR $\beta$  antibody. GR $\beta$  is mainly localized in the cytoplasm following transfection
